# Supplementary material
Source: Springer Nature journal article supplement (https://www.springermedizin.de/resource/supplementary/13058_2012_3168_MOESM14_ESM.pdf/9703426)

**A**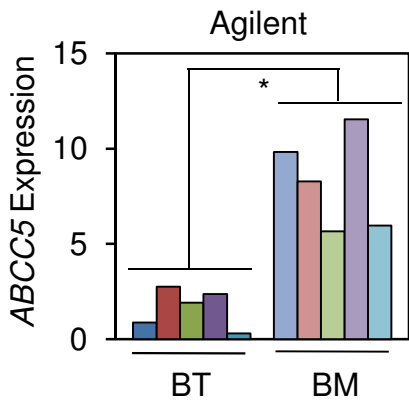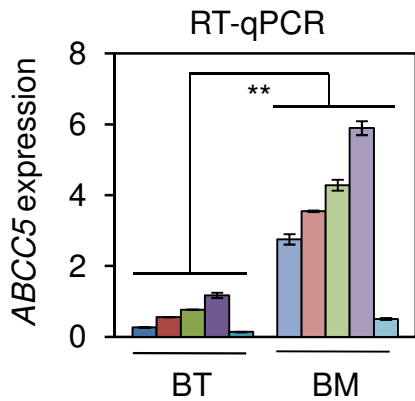**B**

### Primary Breast Tumors

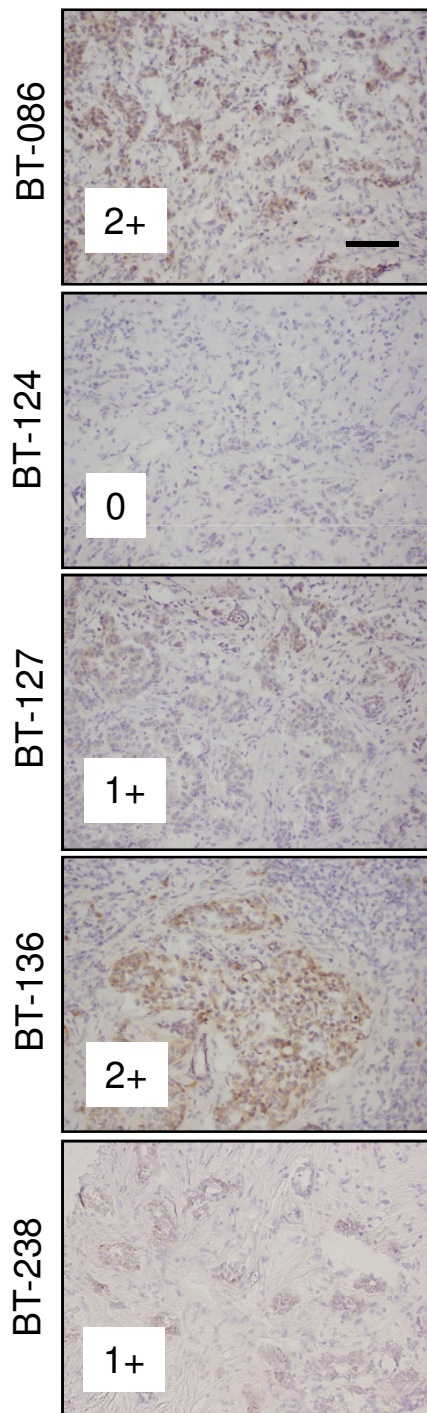

### Breast Cancer Bone Metastases

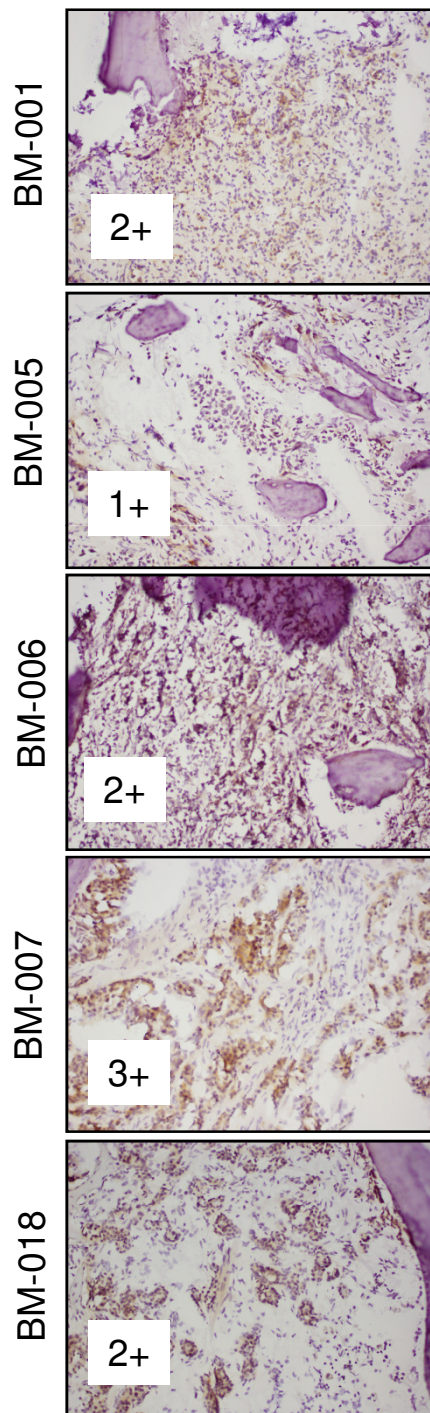

Supplement: MOESM14 [file 9703426]
